# Supplementary material for: 25-Hydroxycholesterol-Conjugated EK1 Peptide with Potent and Broad-Spectrum Inhibitory Activity against SARS-CoV-2, Its Variants of Concern, and Other Human Coronaviruses
Source: MDPI journal article supplement (doi:10.3390/ijms222111869), 2021-11-01
Supplement: s1 [file s1]

Supplementary Materials for

## **25-Hydroxycholesterol-Conjugated EK1 Peptide with Potent and Broad-Spectrum Inhibitory Activity against SARS-CoV-2, Its Variants of Concern and Other Human Coronaviruses**

**Qiaoshuai Lan <sup>1,†</sup>, Chao Wang <sup>2,†</sup>, Jie Zhou <sup>1</sup>, Lijue Wang <sup>1</sup>, Fanke Jiao <sup>1</sup>, Yanbo Zhang <sup>1</sup>, Yanxing Cai <sup>1</sup>, Lu Lu <sup>1</sup>, Shuai Xia <sup>1,\*</sup>, and Shibo Jiang <sup>1,\*</sup>**

**1** Key Laboratory of Medical Molecular Virology (MOE/NHC/CAMS), School of Basic Medical Sciences, Shanghai Institute of Infectious Disease and Biosecurity, Fudan University, 130 Dong An Road, Shanghai 200032, China; 18111010010@fudan.edu.cn (Q.L.); 19211010046@fudan.edu.cn (J.Z.); 19111010061@fudan.edu.cn (L.W.); 20111010053@fudan.edu.cn (F.J.); 19301050218@fudan.edu.cn (Y.Z.); 18111010051@fudan.edu.cn (Y.C.); lul@fudan.edu.cn (L.L.)

**2** State Key Laboratory of Toxicology and Medical Countermeasures, Beijing Institute of Pharmacology and Toxicology, 27 Tai-Ping Road, Beijing 100850, China; chaow301@sina.com

**\*** Correspondence: sxia15@fudan.edu.cn (S.X.); shibojiang@fudan.edu.cn (S.J.)

**†** These authors contributed equally to this work.

### Figure legend

**Supplementary Figure S1. Broad coronavirus inhibitory activity of 25-HC.**

**Supplementary Figure S2. Cytotoxicity of 25-HC-modified peptides.**

**Supplementary Figure S3. In vivo protective efficacy of low dosage EK1P4HC (1mg/kg) against HCoV-OC43 challenge in the newborn mice model.**

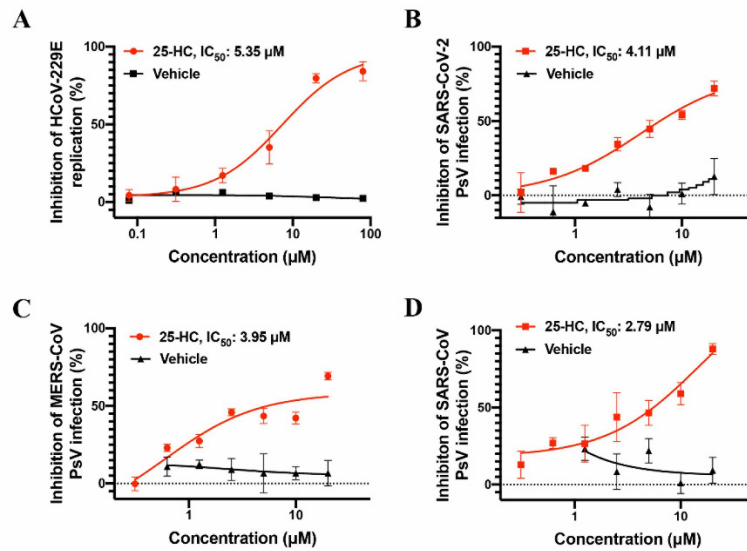

**Supplementary Figure S1. Broad coronavirus inhibitory activity of 25-HC.** (A) Inhibitory activity of 25-HC against authentic HCoV-229E infection. (B) Inhibitory activity of 25-HC against SARS-CoV-2 PsV infection. (C) Inhibitory activity of 25-HC against MERS-CoV PsV infection. (D) Inhibitory activity of 25-HC against SARS-CoV PsV infection.

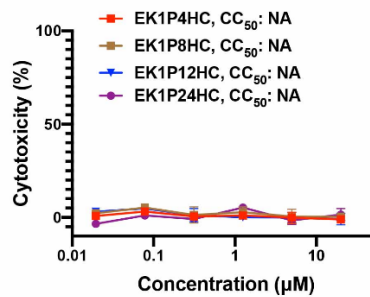

**Supplementary Figure S2. Cytotoxicity of 25-HC-modified peptides.**

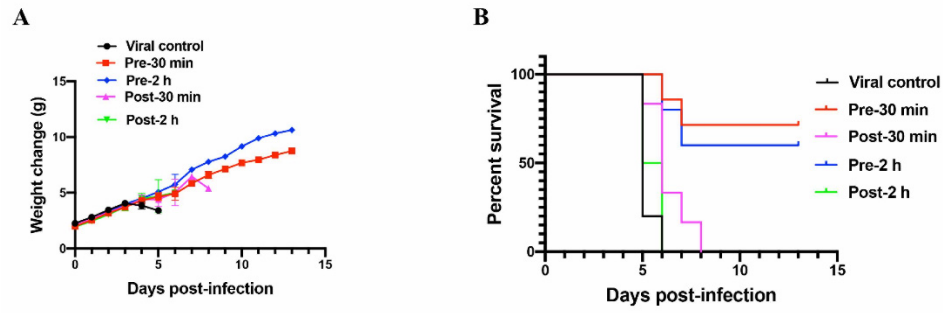

**Supplementary Figure S3. In vivo protective efficacy of low dosage EK1P4HC (1mg/kg) against HCoV-OC43 challenge in the newborn mice model. (A) Body weight change of HCoV-OC43-infected newborn mice. (B) Survival curves of HCoV-OC43-infected newborn mice.**
